# Supplementary material
Source: PubMed Central journal article supplement (PMC9706455)
Supplement: kiac418_supplementary_data.pdf [file kiac418_supplementary_data.pdf]

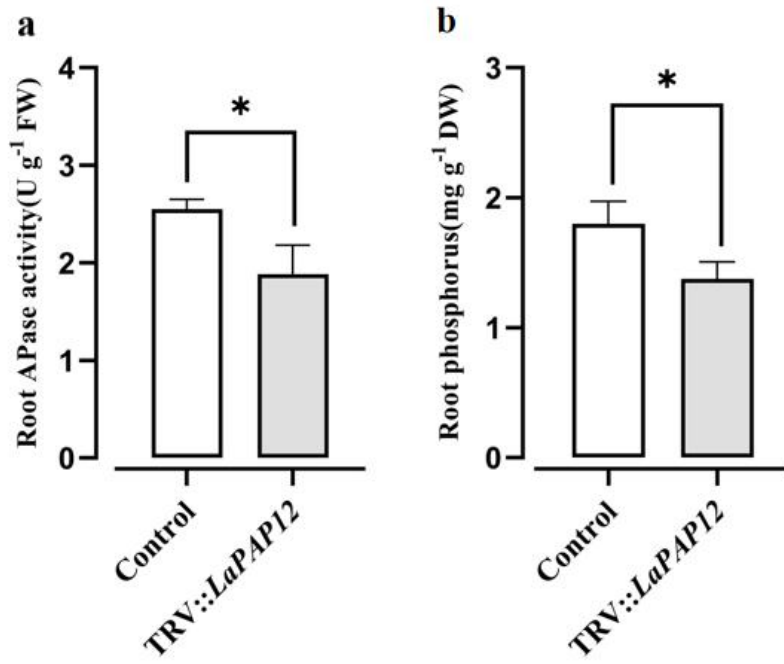

**Supplemental Figure S1** Root-secreted APase activity (a) and root phosphorus content (b) in knock-down plant of *LaPAP12* (TRV::*LaPAP12*) and control. Data are means  $\pm$  standard error (n = 3), the significant differences are indicated \*p < 0.05, unpaired two-tailed Student's t test.

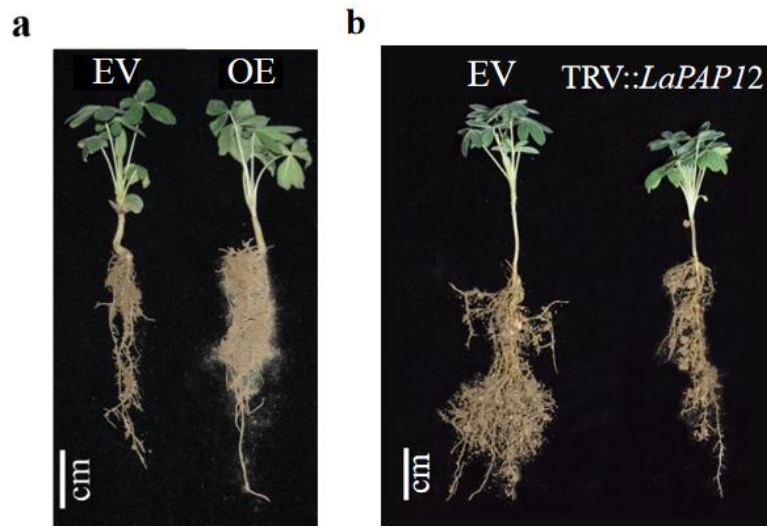

**Supplemental Figure S2** Rhizosphere formation in white lupin OE-*LaPAP12* and the empty vector (EV) control (a), knock-down plant of *LaPAP12* (TRV::*LaPAP12*) and the empty vector (EV) (b). Scale: 5 cm.

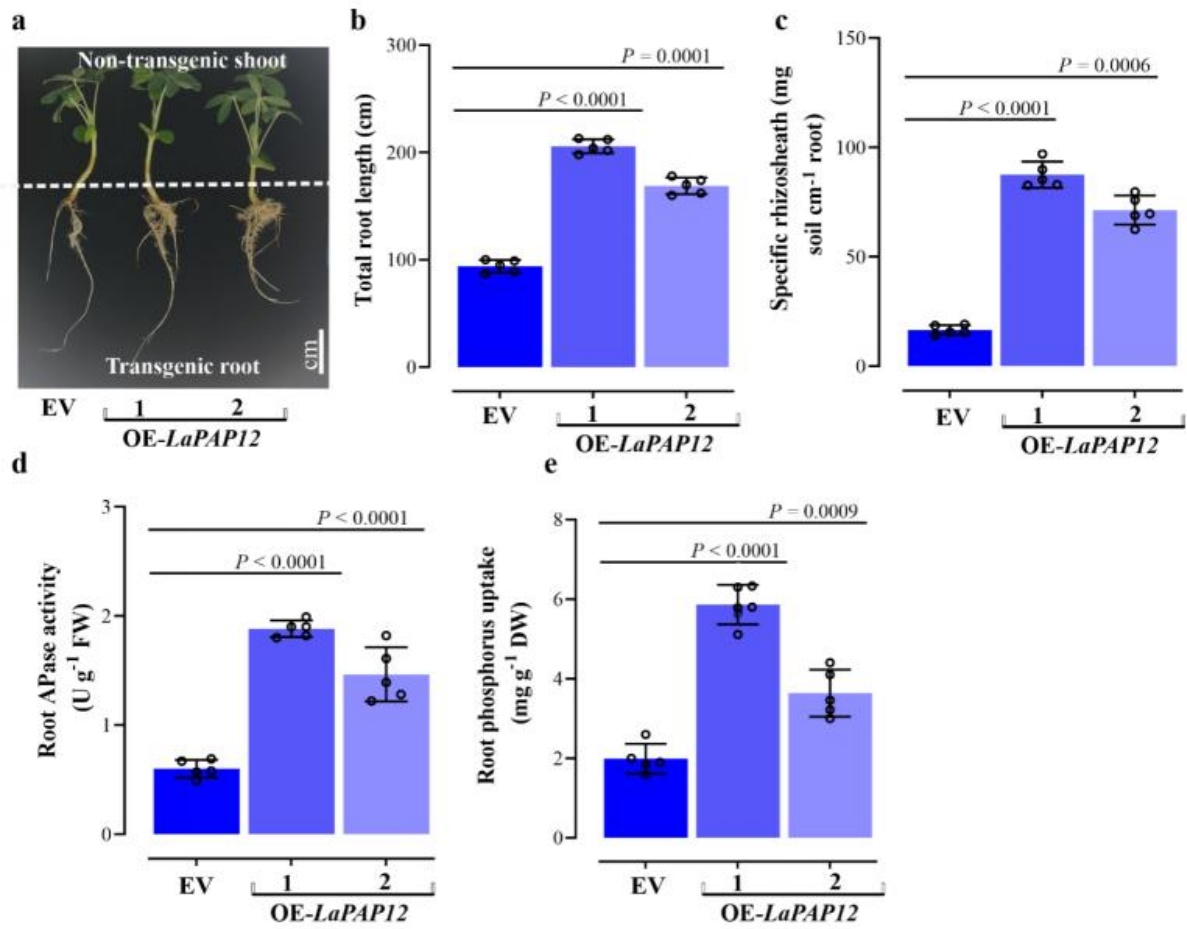

**Supplemental Figure S3** White lupin transgenic hairy root initiation and other root-related traits under low P soil drying conditions. (a) Initiation of white lupin hairy root in nutrient solution before being transplanted into the soil; (b) Total root length (cm), (c) Specific rhizosheath weight ( $\text{mg soil cm}^{-1}$  root) of *LaPAP12*-overexpressing (OE- *LaPAP12*) and control plants (EV), (d) Root APase activity ( $\text{Ug}^{-1}$  FW), (e) Root phosphorus content ( $\text{mg g}^{-1}$  DW). Data were collected after the root system along with the attached rhizosheath soil were harvested from the pots. Different letters at the top of bars indicate significant differences among OE-*LaPAP12* and EV hairy roots. OE-*LaPAP12*, roots overexpressing *LaPAP12*; EV, empty vector; FW, fresh weight; DW, dry weight.

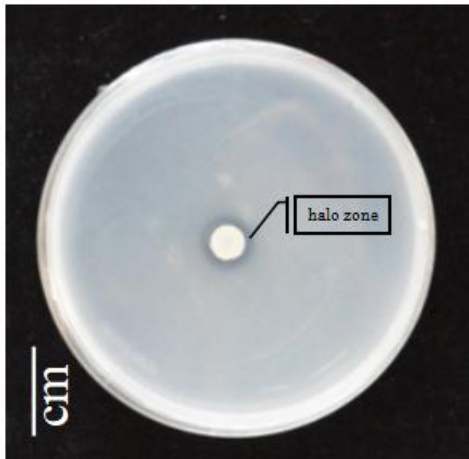

**Supplemental Figure S4**  $\text{Ca}_3(\text{PO}_4)_2$  solubilization by *Bacillus megaterium* strain (scale: 1 cm).

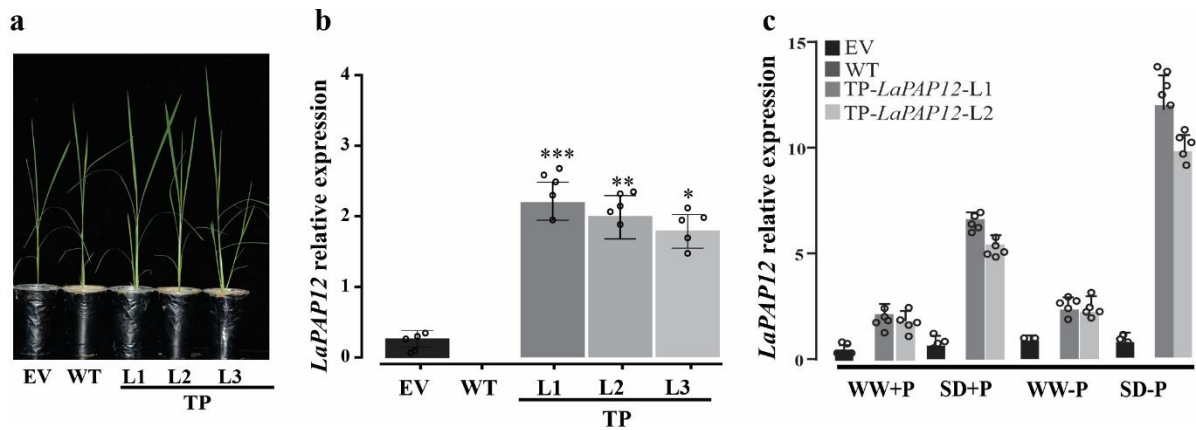

**Supplemental Figure S5** Phenotypic observation and expression analysis of transgenic overexpressing TP-*LaPAP12* and WT rice plants. (a) Phenotype of EV, WT and transgenic rice lines; (b) RT-qPCR analysis of EV, WT and TP-*LaPAP12* rice lines; (c) RT-qPCR analysis of *LaPAP12* in EV, WT, and transgenic rice lines under four different treatments. Data are means  $\pm$  standard error (n = 5). TP- *LaPAP12*, *LaPAP12*-overexpressing lines; EV, empty vector; WT, wild-type; WW+P, well-watered with sufficient phosphorus (P); SD+P, soil drying with sufficient P; WW-P, well-watered with P deficiency; SD-P, soil drying with P deficiency.

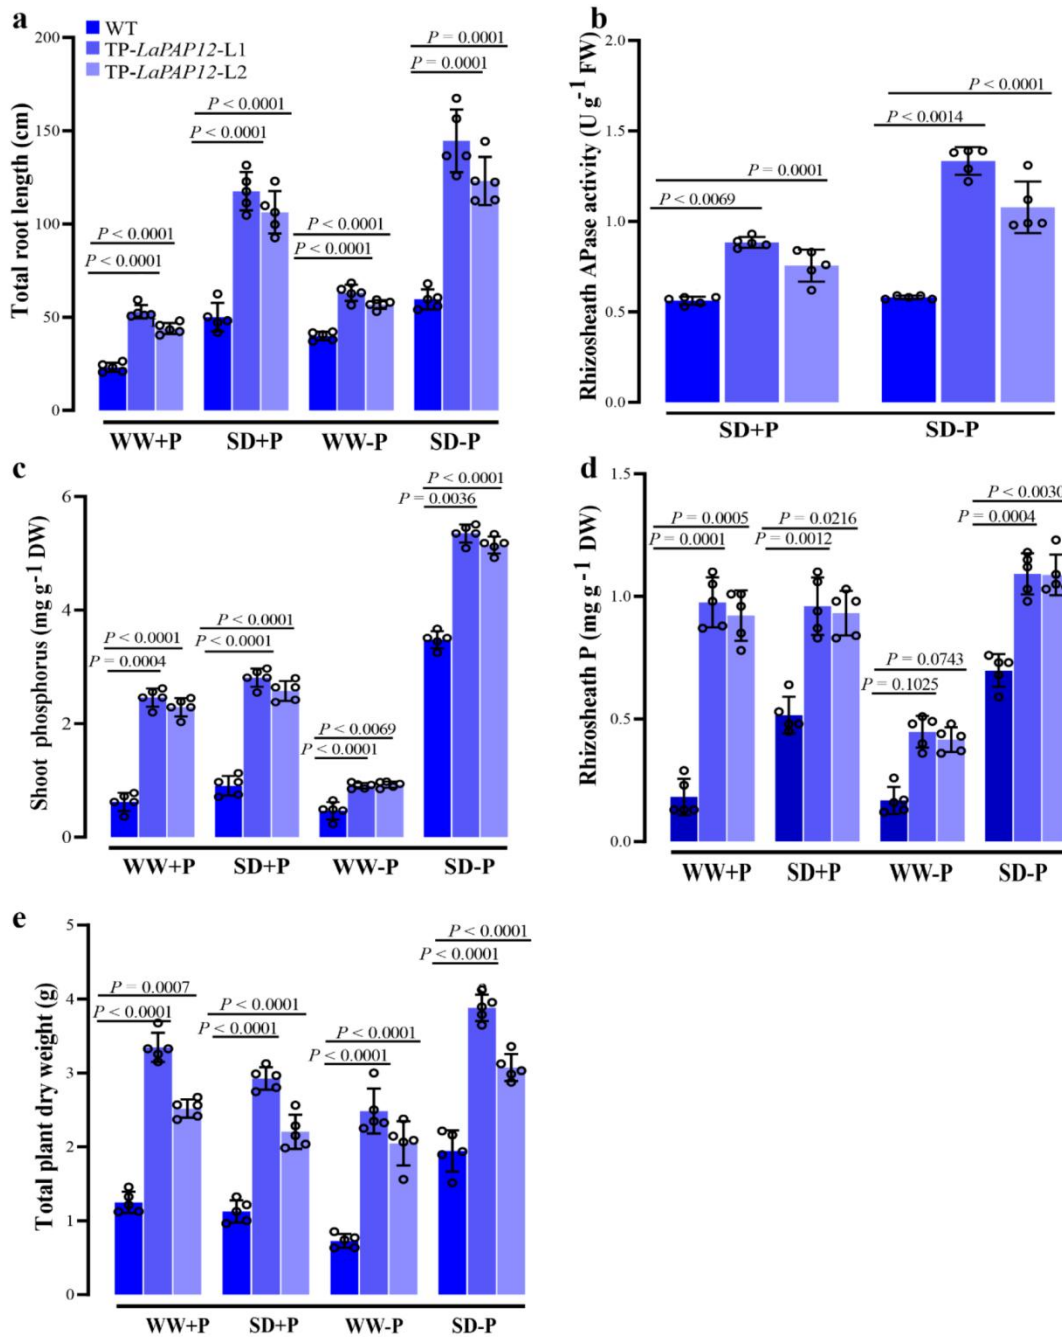

**Supplemental Figure S6** Physiological and biochemical traits displayed by rice plants overexpressing *LaPAP12* under four different treatments. (a) Total root length ( $cm\ plant^{-1}$ ), (b) Rhizosheath APase activity ( $U\ g^{-1}\ DW$ ), (c) Shoot P content ( $mg\ g^{-1}\ DW$ ), (d) Rhizosheath P accumulation ( $mg\ g^{-1}\ DW$ ), (e) Total plant dry weight (g). All the measurements include five independent biological replicates and error bars represent standard error. Different letters at the top of bars indicate significant differences among WT and TP-*LaPAP12* lines under both WW and SD treatments. WW+P, well-watered with sufficient P; SD+P, soil drying with sufficient P; WW-P, well-watered with P deficiency; SD-P, soil drying with P deficiency.

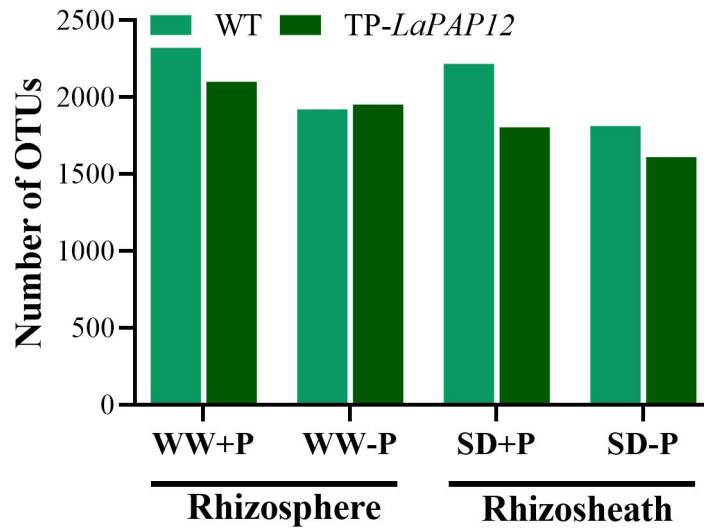

**Supplemental Figure S7** The total number of bacterial OTUs (operational taxonomic units) identified in WT and TP-*LaPAPI2* rice lines. Rhizosphere samples were collected from the WW+P and WW-P treatments, while rhizosheath samples were collected from SD+P and SD-P treatments. WW+P, well-watered with sufficient phosphorus (P); SD+P, soil drying with sufficient P; WW-P, well-watered with P deficiency; SD-P, soil drying with P deficiency.

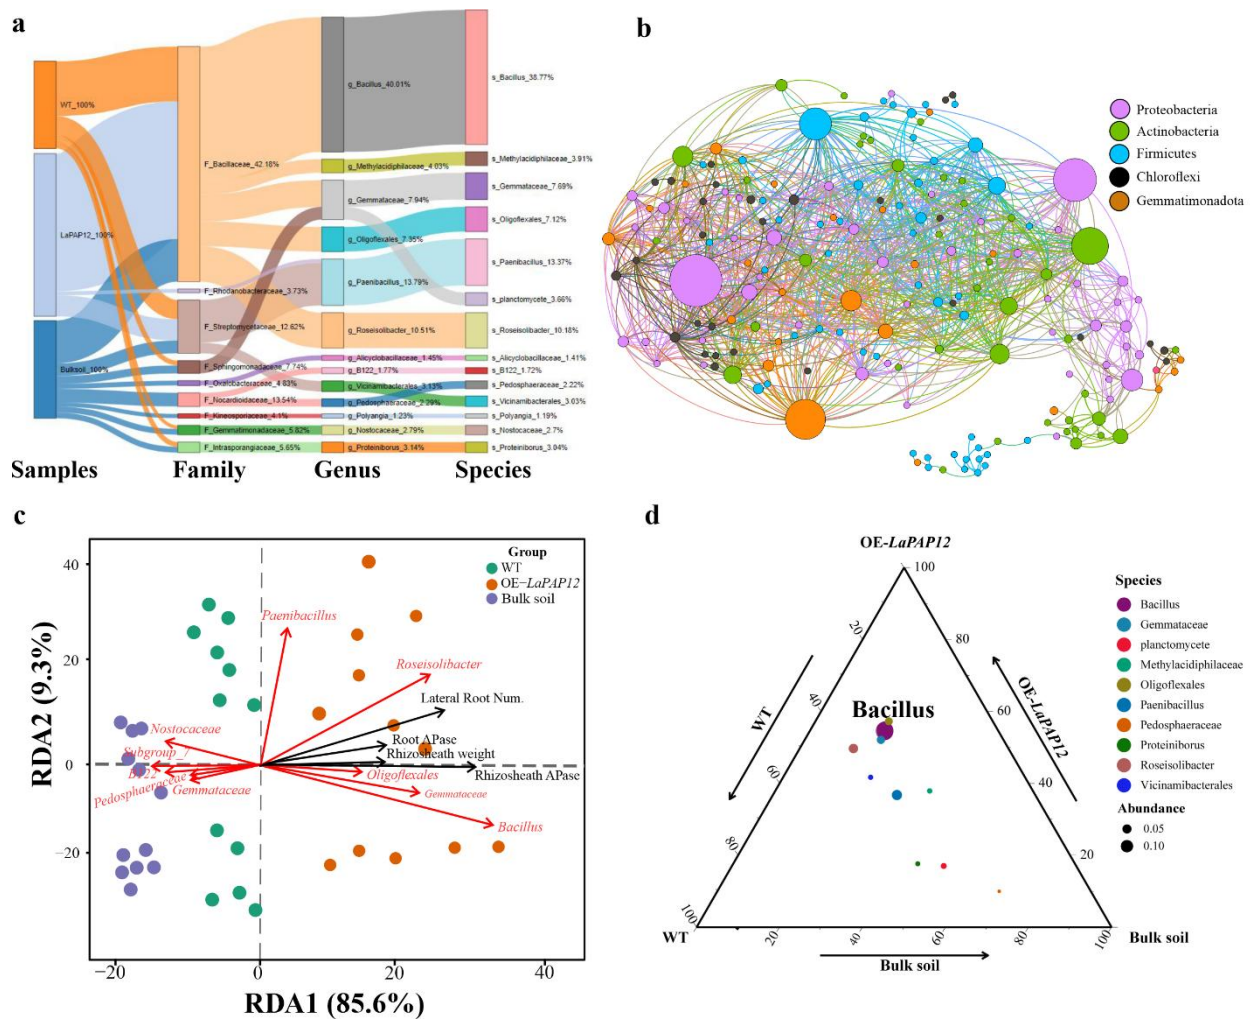

**Supplemental Figure S8** *Bacillus*-enriched rice microbial community of TP-*LaPAP12*-L1 rhizosphere and rhizosphere soils. (a) Sankey diagram of proportional OTUs at the family to genus and genus to species level, (b) Co-occurrence network analysis of top five phylum, nodes (OTUs) colored by phylum. Each node represents a taxon, with a size proportional to its relative abundance across all samples, while different color edges between the nodes represent positive and negative correlations between taxa. Pearson coefficient correlations with a score lower than  $-0.7$  and higher than  $0.7$ , and  $q$ -value  $<0.01$  were considered significant, (c) Redundancy Analysis (RDA) showing the relationship between environmental variables and biological variables, (d) Ternary plot representing the proportion and connection of bacterial taxa (at the species level) among WT, TP-*LaPAP12*, and bulk soil.



**Supplemental Table S1.** Solubility index for  $\text{Ca}_3(\text{PO}_4)_2$  solubilization by *Bacillus megaterium* strain.

| Number | halo zone diameter<br>(D)(cm) | strain diameter<br>(d)(cm) | Solubility index<br>(D/d) |
|--------|-------------------------------|----------------------------|---------------------------|
| 1      | 1.34                          | 0.77                       | 1.74                      |
| 2      | 1.35                          | 0.83                       | 1.63                      |
| 3      | 1.25                          | 0.76                       | 1.64                      |
| 4      | 1.51                          | 0.92                       | 1.64                      |

**Supplemental Table S2.** Estimation of indole acetic acid (IAA) by the *Bacillus megaterium* after 24, 48, and 96 h of incubation using spectrophotometry.

| <b>Bacterial strain</b>    | <b>Cultured medium</b> | <b>Incubation period</b> | <b>IAA concentration (<math>\mu\text{g/mL}</math>)</b> |
|----------------------------|------------------------|--------------------------|--------------------------------------------------------|
| <i>Bacillus megaterium</i> | LB medium              | 24h                      | $2.34 \pm 0.27$                                        |
|                            | LB medium + tryptophan | 24h                      | $6.32 \pm 1.11$                                        |
| <i>Bacillus megaterium</i> | LB medium              | 48h                      | $14 \pm 0.39$                                          |
|                            | LB medium + tryptophan | 48h                      | $52.36 \pm 2.14$                                       |
| <i>Bacillus megaterium</i> | LB medium              | 96h                      | $1.67 \pm 0.98$                                        |
|                            | LB medium + tryptophan | 96h                      | $10.78 \pm 0.76$                                       |

Data represent the average value of three replicates  $\pm$  standard deviation.

**Supplemental Table S3.** List of primers used in this study.

| Name            | Strand  | Sequence                                                          | Purpose                      |
|-----------------|---------|-------------------------------------------------------------------|------------------------------|
| <i>LaPAP12</i>  | Forward | GAGCTCGGTACCCGGGGATCCATGTCCTCTTTA<br>TGTACATGTAAGTGTATCG          | Vector<br>construction       |
| <i>LaPAP12</i>  | Reverse | CAGGTCGACTCTAGAGGATCCTCACATTTTTTG<br>TTACAGTGGGTAAGATTTTGATTTTTTG |                              |
| <i>LaPAP12</i>  | Forward | TACCGAATTCTCTAGATGCTTATGAGCGATCTGAACGTG<br>T                      | VIGS                         |
| <i>LaPAP12</i>  | Reverse | ATGGAGGCCTTCTAGAACTGGCTTCACGGTATGCTGA                             |                              |
| 388F            | Forward | ACTCCTACGGGAGGCAGCAG                                              | 16S<br>sequencing            |
| 806R            | Reverse | GGACTACHVGGGTWTCTAAT                                              |                              |
| 27-F            | Forward | AGAGTTTGATCCTGGCTCAG                                              | <i>Bacillus</i><br>detection |
| 492-R           | Reverse | GGCTACCTTGTTACGACTT                                               |                              |
| <i>OsActin</i>  | Forward | CCAGCAGATGTGGATTGCCA                                              | Normalize<br>expression      |
| <i>OsActin</i>  | Reverse | CGGCGATAACAGCTCCTCTT                                              |                              |
| <i>LaActin</i>  | Forward | AGATTTGGCATCACACTTTCTAC                                           | Normalize<br>expression      |
| <i>LaActin</i>  | Reverse | ATTTGGGTCATCTTCTCTCTGTT                                           |                              |
| <i>LaPAP12</i>  | Forward | CAGCATAACCGTGAAGCCAGT                                             | qPCR                         |
| <i>LaPAP12</i>  | Reverse | GCCTCCACTGCGTATCCATC                                              |                              |
| <i>LaPAP22</i>  | Forward | TGCCCTTTGAAGAAAGTGGGT                                             | qPCR                         |
| <i>LaPAP22</i>  | Reverse | CCAAGGTGCATGCAATAGAGC                                             |                              |
| <i>LaPAP18b</i> | Forward | CTGGTCATGTGCACGCTTAT                                              | qPCR                         |
| <i>LaPAP18b</i> | Reverse | GCTTCACGGAATTCGGACCA                                              |                              |
| <i>LaPAP16</i>  | Forward | GTCGGATCATCAACCCGTCA                                              | qPCR                         |
| <i>LaPAP16</i>  | Reverse | GTCCGTCCATGCGTTCTCTC                                              |                              |
| <i>LaPAP9b</i>  | Forward | ACTACAGCCATGCATCGGAAT                                             | qPCR                         |
| <i>LaPAP9b</i>  | Reverse | GTGACGGTGACTGTGACGAA                                              |                              |
| <i>LaPAP18a</i> | Forward | TACCGATGTGGCGGTTATGG                                              | qPCR                         |
| <i>LaPAP18a</i> | Reverse | GATGTTGCATTCGATCGGCA                                              |                              |
| <i>LaPAP7a</i>  | Forward | TGCCTCTCTCATCACCTACCT                                             | qPCR                         |
| <i>LaPAP7a</i>  | Reverse | TCCCATCTGAGTGGCAACAA                                              |                              |
| <i>LaPAP17</i>  | Forward | ACAGTGGTACAGTGTGTTGGG                                             | qPCR                         |
| <i>LaPAP17</i>  | Reverse | GGGATAATGCCCTGCCAGTC                                              |                              |
| <i>LaPAP27c</i> | Forward | TTCTGCGCAACGTGTAGTCA                                              | qPCR                         |
| <i>LaPAP27c</i> | Reverse | GCTCAATCTGCGCCGTA AAC                                             |                              |
| <i>LaPAP18c</i> | Forward | TGTTGACCTCCTCCTCGAA                                               | qPCR                         |
| <i>LaPAP18c</i> | Reverse | GCTACGGCGTCATATCTCCC                                              |                              |
| <i>LaPAP7b</i>  | Forward | GATCTAAGGCATGGAGGGGC                                              | qPCR                         |
| <i>LaPAP7b</i>  | Reverse | TGCTGGATTGAGATCTTTGGGT                                            |                              |
| <i>LaPAP27d</i> | Forward | GCACTTCACAGTTCGGCTTC                                              | qPCR                         |
| <i>LaPAP27d</i> | Reverse | TTGAACTCGAGTGGTTCGCA                                              |                              |
| <i>LaPAP9a</i>  | Forward | TTGCCCTTTGGGGTCATGTT                                              | qPCR                         |
| <i>LaPAP9a</i>  | Reverse | CCAGATGGGTTGCCAGTCTT                                              |                              |
| <i>LaPAP27a</i> | Forward | CAATTTCCAGCCTGGCTCAC                                              | qPCR                         |
| <i>LaPAP27a</i> | Reverse | TGGTTGCCACTTGCTGTCAT                                              |                              |
| <i>LaPAP29a</i> | Forward | TTGGAGCGGGAGATGTGAAG                                              | qPCR                         |
| <i>LaPAP29a</i> | Reverse | TACCCCAACTACCTTTCACCG                                             |                              |

|                 |         |                        |      |
|-----------------|---------|------------------------|------|
| <i>LaPAP27b</i> | Forward | GTGGGACCAATTCACAGCTC   | qPCR |
| <i>LaPAP27b</i> | Reverse | GTCTGAGCCAGAACTCCACA   |      |
| <i>LaPAP7c</i>  | Forward | TCGCTACTTCGAGGATCCAG   | qPCR |
| <i>LaPAP7c</i>  | Reverse | ACAGTACTACCATGATGCCCTC |      |
| <i>LaPAP26</i>  | Forward | CTCATGCACGTGCCACTCTA   | qPCR |
| <i>LaPAP26</i>  | Reverse | ACCGGTGACCGCTTGTTATG   |      |
| <i>LaPAP27e</i> | Forward | GAACAGTGGGATGGCGTGAT   | qPCR |
| <i>LaPAP27e</i> | Reverse | GGACCCATCAACTTCGTCTCCT |      |
| <i>LaPAP29b</i> | Forward | TTCTGTGGGAAGCTAACCGA   | qPCR |
| <i>LaPAP29b</i> | Reverse | TGTTGATCGTCGAGGCGTTT   |      |
| <i>LaPAP10a</i> | Forward | TGAAGCGGAGTTGCCAAAAG   | qPCR |
| <i>LaPAP10a</i> | Reverse | TGACACGCGTTCAGATCGTT   |      |
| <i>LaPAP20c</i> | Forward | GCGTGTTCTGAAGCCTCATTT  | qPCR |
| <i>LaPAP20c</i> | Reverse | ATTGAACTGTTCGAGGGGTT   |      |
| <i>LaPAP10b</i> | Forward | TGAGCGCTTTACTCGGGTTT   | qPCR |
| <i>LaPAP10b</i> | Reverse | TGTCCAAAGTTAGCCTCCCTG  |      |
| <i>LaPAP20e</i> | Forward | TGGGACTCATTTGGTCGCTT   | qPCR |
| <i>LaPAP20e</i> | Reverse | ACACCCGCCACATCAAAAAGA  |      |
| <i>LaPAP20d</i> | Forward | CCACACGGCAGTTTTGGTTT   | qPCR |
| <i>LaPAP20d</i> | Reverse | GTAGGGCCGTTCCGTTACTG   |      |
| <i>LaPAP10d</i> | Forward | CCACACGGCAGTTTTGGTTT   | qPCR |
| <i>LaPAP10d</i> | Reverse | AAAAGTCCGTTGGTGTGTTT   |      |
| <i>LaPAP10c</i> | Forward | CCACACGGCAGTTTTGGTTT   | qPCR |
| <i>LaPAP10c</i> | Reverse | TCCAACATACAGTAGGGCCG   |      |
| <i>LaPAP23</i>  | Forward | AACCACTGGTGGCAAAGGAG   | qPCR |
| <i>LaPAP23</i>  | Reverse | GCAGGAACCGCAAATCTTGA   |      |
| <i>LaPAP29c</i> | Forward | ACAAAGAATCTGTGCGCGTG   | qPCR |
| <i>LaPAP29c</i> | Reverse | GCTTCAAGAAGCGAGTGGTG   |      |

---
